# Decreasing Prevalence of the Full Metabolic Syndrome but a Persistently High Prevalence of Dyslipidemia among Adult Arabs

Nasser M. Al-Daghri<sup>1\*</sup>, Omar S. Al-Attas<sup>1</sup>, Majed S. Alokail<sup>1</sup>, Khalid M. Alkharfy<sup>2</sup>, Shaun Louie B. Sabico<sup>1</sup>, George P. Chrousos<sup>1,3</sup>

**1** Biochemistry Department, College of Science, King Saud University, Riyadh, Kingdom of Saudi Arabia, **2** Clinical Pharmacy Department, College of Pharmacy, King Saud University, Riyadh, Kingdom of Saudi Arabia, **3** Division of Endocrinology, Metabolism and Diabetes, University of Athens Medical School, Children's Hospital Aghia Sophia, Athens, Greece

## Abstract

A decade has passed since metabolic syndrome (MetS) was documented to be highly prevalent in the kingdom of Saudi Arabia. No follow-up epidemiologic study was done. This study aims to fill this gap. In this cross-sectional, observational study, a total of 2850 randomly selected Saudi adults aged 18–55 years were recruited. Subjects' information was generated from a database of more than 10,000 Saudi citizens from the existing Biomarkers Screening in Riyadh Program (RIYADH Cohort), Saudi Arabia. Anthropometrics included body mass index (BMI), blood pressure, as well as waist and hip circumferences. Fasting blood glucose and lipid profile were determined using routine laboratory procedures. The definition of ATP-III (NHANES III) was used for the diagnosis of the full MetS. The overall prevalence of complete MetS was 35.3% [Confidence-Interval (CI) 33.5–37.01]. Age-adjusted prevalence according to the European standard population is 37.0%. Low HDL-cholesterol was the most prevalent of all MetS risk factors, affecting 88.6% (CI 87.5–89.7) and hypertriglyceridemia the second most prevalent, affecting 34% (CI 32.3–35.7) of the subjects. The prevalence of the full MetS decreased from previous estimates but remains high, while dyslipidemia remains extremely high, affecting almost 90% of middle-aged Arabs. Screening for dyslipidemia among Saudi adults is warranted, especially among those most at risk. Scientific inquiry into the molecular causes of these manifestations should be pursued as a first step in the discovery of etiologic therapies.

**Citation:** Al-Daghri NM, Al-Attas OS, Alokail MS, Alkharfy KM, Sabico SLB, et al. (2010) Decreasing Prevalence of the Full Metabolic Syndrome but a Persistently High Prevalence of Dyslipidemia among Adult Arabs. PLoS ONE 5(8): e12159. doi:10.1371/journal.pone.0012159

**Editor:** Jonatan R. Ruiz, Karolinska Institutet, Sweden

**Received:** May 28, 2010; **Accepted:** July 18, 2010; **Published:** August 13, 2010

**Copyright:** © 2010 Al-Daghri et al. This is an open-access article distributed under the terms of the Creative Commons Attribution License, which permits unrestricted use, distribution, and reproduction in any medium, provided the original author and source are credited.

**Funding:** The authors have no support or funding to report.

**Competing Interests:** The authors have declared that no competing interests exist.

\* E-mail: aldaghri2000@hotmail.com

## Introduction

Metabolic syndrome (MetS), which is the clinical term used for the co-occurrence of several cardiovascular risk factors, is quite prevalent in many developed nations. Al-Nozha and colleagues previously reported that MetS was almost 40% among adults in a kingdom-wide sample population taken from 1995–2000 [1]. Since then, other epidemiologic studies conducted within the Arab Peninsula confirmed the same high prevalence [2–4]. Aside from the conventional risk factors for MetS which include over nutrition and sedentary lifestyle, other risk factors peculiar to the Arab population have been identified. These include acute post cessation smoking [5], and metabolic abnormalities such as altered adipocytokine levels [6], particularly leptin [7], and homocysteine [8]. A decade has passed, however, and no follow-up epidemiologic study was done in the Saudi Arab population to determine whether the epidemic has been addressed properly. This study aims to determine the prevalence of MetS in a cohort of adult Saudis living in urban areas and to identify which are the most prevalent MetS components.

## Materials and Methods

### Subjects

In this cross-sectional community-based study, a total of 2,850 Saudi adults aged 18–55 years were included. Subjects were part of the capital-wide Biomarker Screening in Riyadh (BSR), a collaborative effort between the Biomarkers Research Program (BRP) of King Saud University (KSU) and the Ministry of Health in Riyadh, Kingdom of Saudi Arabia (RIYADH Cohort). Ethical approval was obtained from the College of Medicine Research Center Ethics Committee of KSU, Riyadh, KSA. In brief, BSR was launched to identify and employ novel biomarkers of chronic non-communicable diseases, including diabetes mellitus (DM), cardiovascular diseases (CVD), and obesity, among consenting Saudis. Subjects were recruited randomly from different Primary Health Care Centers (PHCC) across Riyadh. No expatriates were included in the conduct of this study. Each participating subject submitted a signed consent form, a general questionnaire containing demographic, past and present medical history, as well as diet information from the food frequency questionnaire. Subjects' information was taken from the existing database of more than 10,000 subjects (RIYADH Cohort).

## Anthropometric measurements

Consenting adults were invited to their respective PHCC after a 10 h overnight fasted state. Anthropometric measurements included height (cm), weight (cm), waist (cm) and hip (cm) circumferences and were taken and noted by trained nurses. Systolic and diastolic blood pressures were taken twice with a 15-minute interval. The average of both readings was recorded. Body mass index (BMI) was calculated as weight (kg) over height (m<sup>2</sup>).

## Biochemical measurements

Blood was drawn, centrifuged and processed in the same day. Both whole blood and serum were placed in plain polystyrene tubes and delivered to BRP for storage at -2°C. Fasting blood glucose, triglycerides, and HDL cholesterol were quantified using routine laboratory analysis (Konelab, Finland). This biochemical analyzer (Konelab) was calibrated routinely prior to the analysis of all serum samples using quality control samples provided (Thermo Fisher Scientific, Finland). Glucose test method employed glucose oxidase and modified Trinder color reaction catalyzed by the enzyme peroxidase. Triglycerides test method employed hydrolysis, phosphorylation and oxidation leading to the formation of quinoxaline dye which is absorbed at 510 nm. HDL-cholesterol test method employed homogenous enzymatic colorimetric test by cholesterol oxidase coupled with poly(ethylene-glycol) to the amino groups. Measurement ranges were as follows: glucose (0.3–20.0 mmol/L); triglycerides (0.05–11.0 mmol/L), HDL-cholesterol (0.16–2.80 mmol/L). All samples fell within normal detection limits. Standard International Units (mmol/L) were used to record the results. For validation purposes, randomized samples were sent to a reference lab within the kingdom (King Faisal Specialist Hospital and Research Center, Riyadh, KSA).

## Definition of MetS

The definition of MetS used was according to the National Cholesterol Education Program-Third Adult Treatment Panel (NCEP ATP III), three or more of the following criteria must be fulfilled: fasting blood glucose level  $\geq 5.6$  mmol/l; blood pressure  $\geq 130/85$  mm Hg; triglycerides  $\geq 1.7$  mmol/l; HDL cholesterol  $< 1.03$  mmol/l for men and  $< 1.29$  mmol/l for women; and waist circumference  $> 102$  cm for men and  $> 88$  cm for women [9].

## Data Analysis

Statistical analysis was done using the Statistical Package for Social Sciences (SPSS) version 11.5 (Chicago, Illinois). Continuous variables are shown as mean  $\pm$  standard deviation. Age adjustment was done with a European standard population.

Frequencies were presented as percentage (confidence-interval). MetS prevalence was presented as overall prevalence, age-adjusted prevalence and prevalence according to age.

## Results

The over-all prevalence of MetS was 35.3% (CI 33.5–37.01), while an age adjusted prevalence was almost 37.0%. Low HDL-cholesterol remains the most common MetS component with almost 9 out of 10 [88.6% (CI 87.5–89.7)] of subjects affected followed by hypertriglyceridemia with an over-all prevalence of 34% (CI 32.3–35.7) (Table 1). Males had significantly higher prevalence of high blood pressure, impaired fasting glucose and triglycerides ( $p$ -values 0.004, 0.001 < 0.001 respectively) while females had significantly higher prevalence of abdominal obesity ( $p$ -value < 0.001). Figure 1 shows the alarmingly increasing prevalence of MetS with age, with the age group 50–55 years harboring MetS in almost 6 out of 10 adults. Figures 2 and 3 show the persistent high prevalence of low-HDL-cholesterol and hypertriglyceridemia even after stratification for age, respectively.

## Discussion

There is some improvement in the prevalence of MetS in the kingdom, particularly in Riyadh region where the study was conducted. Prevalence of MetS in urban areas was previously recorded at 44.1% (1) compared to 37.0% in the present study. The prevalence of dyslipidemia as evidenced by low HDL-cholesterol and high triglyceride levels, however, remained alarmingly high, continuing to be the most common cardiovascular risk factor among Saudi adults. High prevalence of low HDL-cholesterol was also noted among the elderly in Spain [10] and adults in Nigeria [11], but the prevalence is significantly less than that shown in the present study. This calls for further assessment in terms of possible genetic and epigenetic variations within the population. One way to explore this issue is to address genetic determinants of HDL-cholesterol concentrations. Cholesteryl ester transfer protein (CETP), which is detectable at Taq1, was noted to have relatively modest impact on HDL-concentrations among Saudis [12]. The apolipoprotein B/apolipoprotein A1 ratio on the other hand, was inversely associated to HDL-cholesterol levels and were also associated with components of MetS among Saudis [13]. All in all, little has been done to address the issue of extremely high prevalence of low-HDL cholesterol in the kingdom in terms of identification of causes and early intervention measures. This lack of emphasis has, therefore, translated to the same lack of improvement in terms of decreased

**Table 1.** Prevalence of Individual Components and of the Full MetS in the Urban Saudi Arab Population (Adult criteria NCEP ATP III [9]).

|                                 | Total            | Males            | Females          | P-Value |
|---------------------------------|------------------|------------------|------------------|---------|
| <b>N</b>                        | <b>2850</b>      | <b>1335</b>      | <b>1515</b>      |         |
| <i>Low HDL-Cholesterol</i>      | 88.6 (87.5–89.7) | 89.4 (87.8–91.0) | 87.8 (86.2–89.4) | 0.168   |
| <i>High Blood pressure</i>      | 25.4 (23.7–27.1) | 28.2 (25.6–30.8) | 23.1 (20.9–25.3) | 0.004   |
| <i>Impaired Fasting Glucose</i> | 29.9 (28.3–31.5) | 33.0 (30.5–35.5) | 27.1 (24.9–29.3) | 0.001   |
| <i>Elevated Triglycerides</i>   | 34.0 (32.3–35.7) | 42.0 (39.4–44.6) | 27.0 (24.8–29.2) | <0.001  |
| <i>Abdominal obesity</i>        | 39.1 (37.8–40.9) | 29.0 (26.5–31.5) | 47.8 (45.3–50.3) | <0.001  |
| <i>Prevalence of Full MetS</i>  | 35.3             | 36.6             | 34.1             | 0.176   |

**Note:** Data presented as percentage (confidence interval 95%). Significant at  $p < 0.05$ .

doi:10.1371/journal.pone.0012159.t001

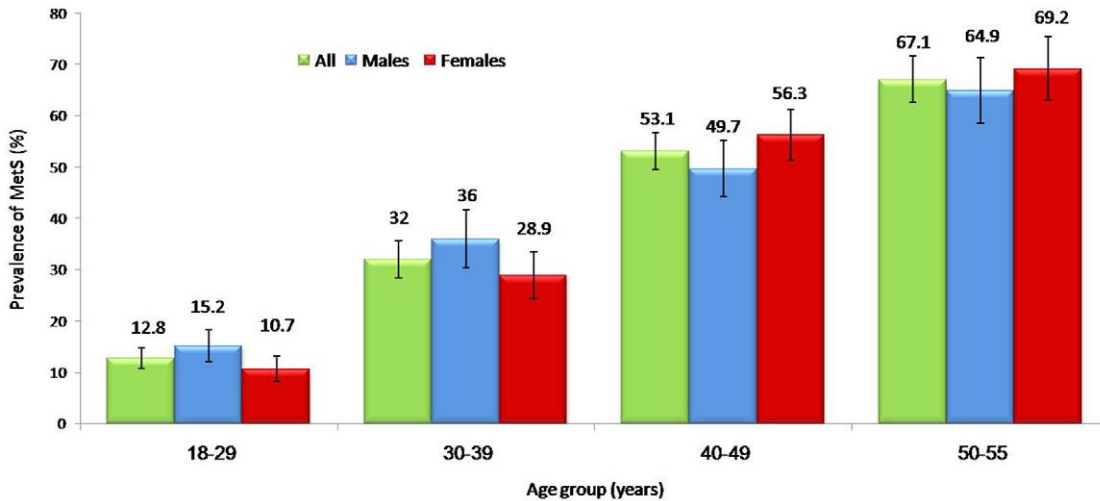

**Figure 1. Prevalence of MetS in males and females according to age groups (adult criteria NCEP ATP III [9]).**  
doi:10.1371/journal.pone.0012159.g001

prevalence of dyslipidemia in the kingdom, and probably in the extended region as well. Parent-offspring transmission-wise, heritability of MetS components had been previously documented among Omani families with strong tendencies for higher BMI, lower HDL-C and larger body weight while higher triglycerides, diastolic BP, abdominal obesity and insulin resistance were more environmentally driven [14]. Extremely high prevalence of low HDL-C has also been documented among Saudi children, affecting ~90% of them [15]. Low HDL-C had the highest heritability among Caucasian individuals [16–17] and Korean twins [18].

While the prevalence of MetS in males is higher, it is not significantly different from females. Similar findings were found in a recent study by Lin and colleagues, where even if a higher prevalence of MetS among males was observed, the mortality risk was greater among postmenopausal women [19]. Gender differences among the components of MetS are influenced by

sex hormones. Indeed, gonadal hormones are directly involved in both glucose and lipid metabolism, with decreased levels of estrogen and/or higher levels of testosterone being associated with insulin resistance and a proatherogenic lipid profile, which makes the male gender by itself a risk factor for cardiovascular disease [20]. Furthermore, this difference may also arise from other factors previously not mentioned which are common among the Saudi male population, such as smoking [21]. Going back to figure 1, males have a higher prevalence of MetS only among the younger age groups, and females eventually catch up once menstruation has ceased, since the cardioprotective effects of the estrogen cycle is lost. Consequently, females have a higher prevalence of obesity than males, and this is true for the rest of the Arabian Gulf States [22].

In summary, the prevalence of the full MetS among urban Saudi adults remains high, but has considerably decreased. Prevalence of low-HDL cholesterol on the other hand remains

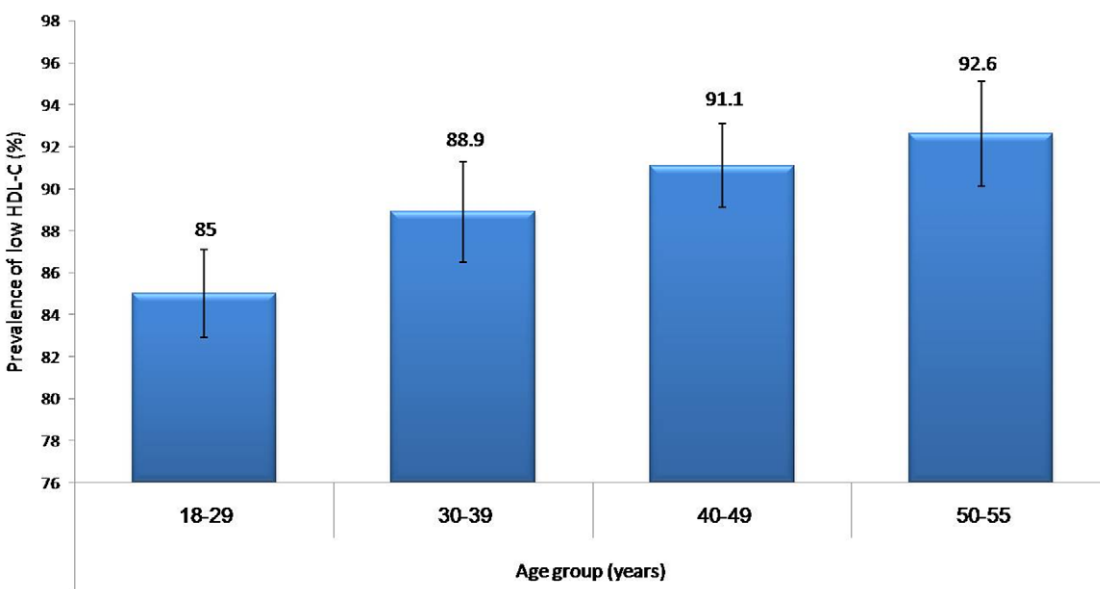

**Figure 2. Prevalence of low HDL-cholesterol stratified according to age (adult criteria NCEP ATP III [9]).**  
doi:10.1371/journal.pone.0012159.g002

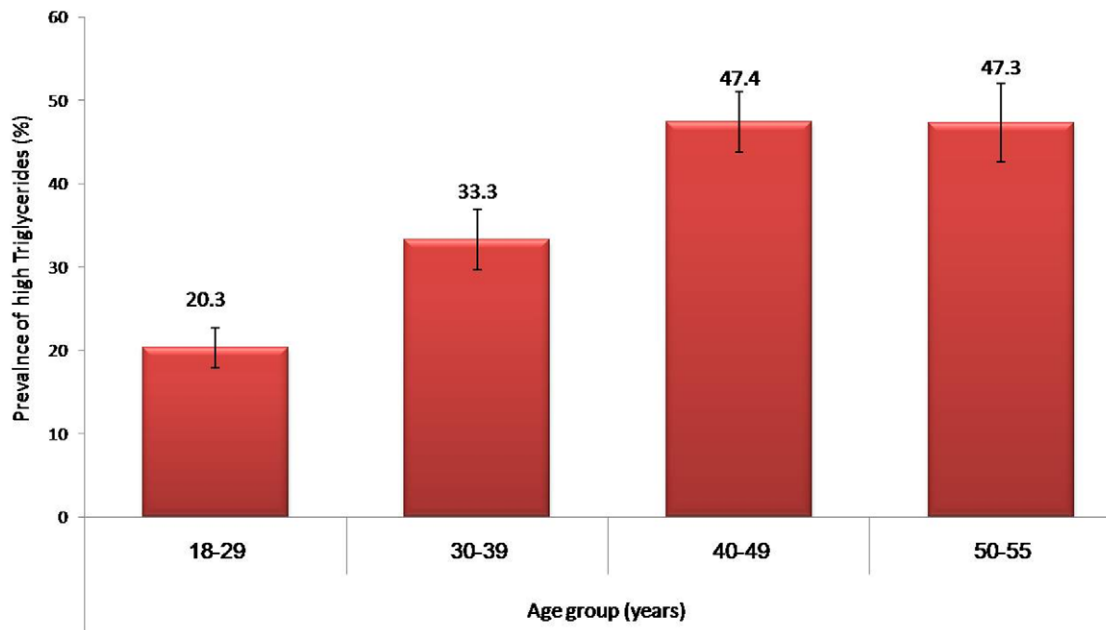

**Figure 3. Prevalence of hypertriglyceridemia stratified according to age (adult criteria NCEP ATP III [9]).**  
doi:10.1371/journal.pone.0012159.g003

extremely prevalent and begs for tougher measures in early intervention and further scientific exploration.

## Acknowledgments

The authors are grateful to Mr. Ahmed Bamakhramah, Mr. Moath Abuzagareet, and the rest of the technicians of the Biomarker Research Program for the analysis of the samples. We thank Mr. Benjamin Vinodson

for the statistical analyses. Lastly we thank Professor John Albers for his precious advice in ensuring the accuracy of the laboratory results.

## Author Contributions

Conceived and designed the experiments: NAD OAA. Performed the experiments: MA KA. Analyzed the data: SLS. Contributed reagents/materials/analysis tools: MA KA. Wrote the paper: SLS GC.

## References

- Al-Nozha M, Al-Khadra A, Arafah MR, Al-Maatouq MA, Khalil MZ, et al. (2005) Metabolic syndrome in Saudi Arabia. *Saudi Med J* 26: 1918–1925.
- Saadi H, Nagelkerke N, Carruthers SG, Benedict S, Abdulkhalek S, et al. (2008) Association of TCF7L2 polymorphism with diabetes mellitus, metabolic syndrome, and markers of beta cell function and insulin resistance in a population-based sample of Emirati subjects. *Diabetes Res Clin Pract* 80: 392–398.
- Khader Y, Bateiha A, El-Khateeb M, Al-Shaikh A, Ajlouni K (2007) High prevalence of the metabolic syndrome among Northern Jordanians. *J Diabetes Complications* 21: 214–219.
- Harzallah F, Alberti H, Ben Khalifa F (2006) The metabolic syndrome in an Arab population: a first look at the new International Diabetes Federation criteria. *Diabet Med* 23: 441–444.
- Al-Daghri NM (2009) Acute post cessation smoking. A strong predictive factor for metabolic syndrome among adult Saudis. *Saudi Med J* 30: 267–271.
- Al-Daghri NM, Al-Attas OS, Al-Rubeaan K, Sallam R (2008) Adipocytokine profile of type 2 diabetics in metabolic syndrome as defined by various criteria. *Diabetes Metab Res Rev* 24: 52–58.
- Al-Daghri N, Al-Rubeaan K, Bartlett WA, Al-Attas O, Jones AF, et al. (2003) Serum leptin is elevated in Saudi Arabian patients with metabolic syndrome and coronary artery disease. *Diabet Med* 20: 832–837.
- Al-Daghri NM (2007) Hyperhomocysteinemia, coronary heart disease, and diabetes mellitus as predicted by various definitions for metabolic syndrome in a hypertensive Saudi population. *Saudi Med J* 28: 339–346.
- Expert Panel on Detection, Evaluation and Treatment of High Blood Cholesterol in Adults (2001) Executive summary of the third report of the National Cholesterol Education Program (NCEP) Expert Panel on Detection, Evaluation, and Treatment of High Blood Cholesterol in Adults (Adult Treatment Panel III). *JAMA* 285: 2486–2497.
- Cea-Calvo L, Lozano JV, Fernandez-Perez C, Llisterri JL, Marti-Canales JC, et al. (2009) Prevalence of low HDL-cholesterol, and relationship between serum HDL and cardiovascular disease in elderly Spanish population. *Int J Clin Pract* 63: 71–81.
- Ulasi II, Ijoma CK, Onodugo OD (2010) A community-based study of hypertension and cardio-metabolic syndrome in semi-urban and rural communities in Nigeria. *BMC Health Serv Res* 10: 71.
- Al-Daghri NM, Al-Attas O, Patel A, Belyaev ND, Bartlett WA, et al. (2003) Association between the cholesteryl ester transfer protein Taq1-detectable B polymorphism and low high-density lipoprotein cholesterol concentration in Saudis. *Clin Sci* 105: 467–772.
- Al-Fadda AA, Al-Daghri NM, Malabu UH (2008) Apolipoprotein B/apolipoprotein A-I ratio in relation to various definitions of MS among Saudi patients with type 2 diabetes mellitus. *Saudi Med J* 29: 821–825.
- Bayoumi RA, Al-Yahyaee SA, Albarwani SA, Rizvi SG, Al-Hadabi S, et al. (2007) Heritability of determinants of the metabolic syndrome among healthy Arabs of the Omani family study. *Obesity (Silver Spring)* 15: 551–556.
- Al-Daghri NM (2010) High prevalence of metabolic syndrome manifestations among Arab youth: A call for early intervention. *Eur J Clin Invest* 2010 [Epub ahead of print].
- Bellia A, Giardina E, Lauro D, Tesaro M, Di Fede G, et al. (2009) "The Linosa Study": epidemiologic and heritability data of the metabolic syndrome in a Caucasian genetic isolate. *Nutr Metab Cardiovasc Dis* 19: 455–461.
- Henneman P, Aulchenko YS, Frants RR, van Dijk KW, Oostra BA, et al. (2008) Prevalence and heritability of the metabolic syndrome and its individual components in a Dutch isolate: the Erasmus Rucphen Family study. *J Med Genet* 45: 572–577.
- Sung J, Lee K, Song YM (2009) Heritabilities of the metabolic syndrome phenotypes and related factors in Korean twins. *J Clin Endocrinol Metab* 94: 4946–4952.
- Lin JW, Caffrey JL, Chang MH, Lin YS (2010) Sex, menopause, metabolic syndrome, and all-cause and cause-specific mortality—cohort analysis from the Third National Health and Nutrition Examination Survey. *J Clin Endocrinol Metab* [Epub ahead of print].
- Regitz-Zagrosek V, Lehmkuhl E, Mahmoodzadeh S (2007) Gender aspects of the role of the metabolic syndrome as a risk factor for cardiovascular disease. *Genet Med* 4(Suppl B): S162–177.
- Basiony MM (2009) Smoking in Saudi Arabia. *Saudi Med J* 30: 876–881.
- Ng SW, Zaghoul S, Ali HI, Harrison G, Popkin BM (2010) The prevalence and trends of overweight, obesity and nutrition-related non-communicable diseases in the Arabian Gulf States. *Obes Rev* [Epub ahead of print].
